# Supplementary material for: Ultrafine PdCo bimetallic nanoclusters confined in N-doped porous carbon for the efficient semi-hydrogenation of alkynes
Source: Royal Society of Chemistry journal article supplement (doi:10.1039/d2dt02765h), 2022-01-01
Supplement: d2dt02765h1.pdf [file d2dt02765h1.pdf]

## Supporting Information

### Ultrafine PdCo bimetallic nanoclusters confined in N-doped porous carbon for the efficient semi-hydrogenation of alkynes

Xuecheng Zhan,<sup>a,#</sup> Hanghang Zhu,<sup>b,#</sup> Haowen Ma,<sup>a,\*</sup> Xiaoli Hu,<sup>a</sup> Yuan Xie,<sup>a</sup> Dajiang Guo,<sup>a</sup>  
Minglin Chen,<sup>a</sup> Ping Ma,<sup>a</sup> Liming Sun,<sup>a</sup> Wei David Wang<sup>b,\*</sup> and Zhengping Dong<sup>b,\*</sup>

<sup>a</sup> Lanzhou Petrochemical Research Center, Petrochemical Research Institute, PetroChina Company Limited, Lanzhou, 730060, PR China.

<sup>b</sup> College of Chemistry and Chemical Engineering, Lanzhou University, Lanzhou, 730000, PR China.

# These authors contribute equally to this work.

\* **Corresponding authors.**

[mahaowen@petrochina.com.cn](mailto:mahaowen@petrochina.com.cn) (Haowen Ma), [ww@lzu.edu.cn](mailto:ww@lzu.edu.cn) (Wei David Wang) and [dongzhp@lzu.edu.cn](mailto:dongzhp@lzu.edu.cn) (Zhengping Dong).

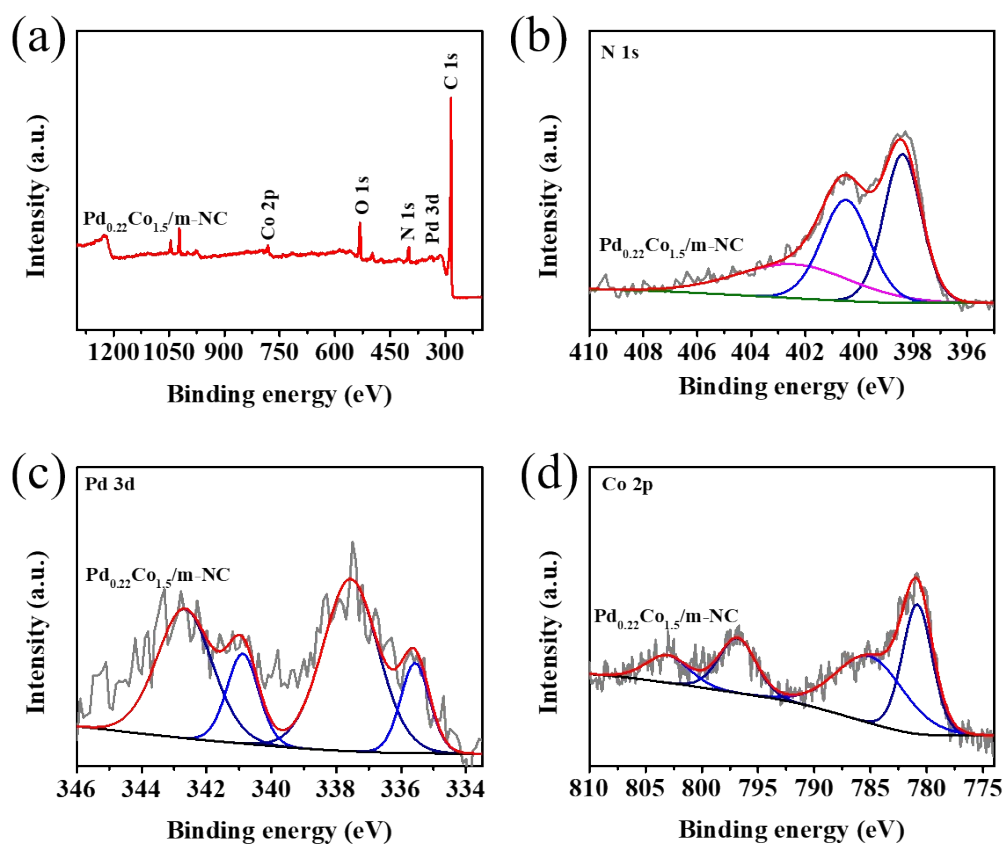

**Figure S1.** (a) The full-range XPS spectrum of  $\text{Pd}_{0.22}\text{Co}_{1.5}/\text{m-NC}$ . The XPS spectra of N 1s (b), Pd 3d (c) and Co 2p (d) of  $\text{Pd}_{0.22}\text{Co}_{1.5}/\text{m-NC}$ .

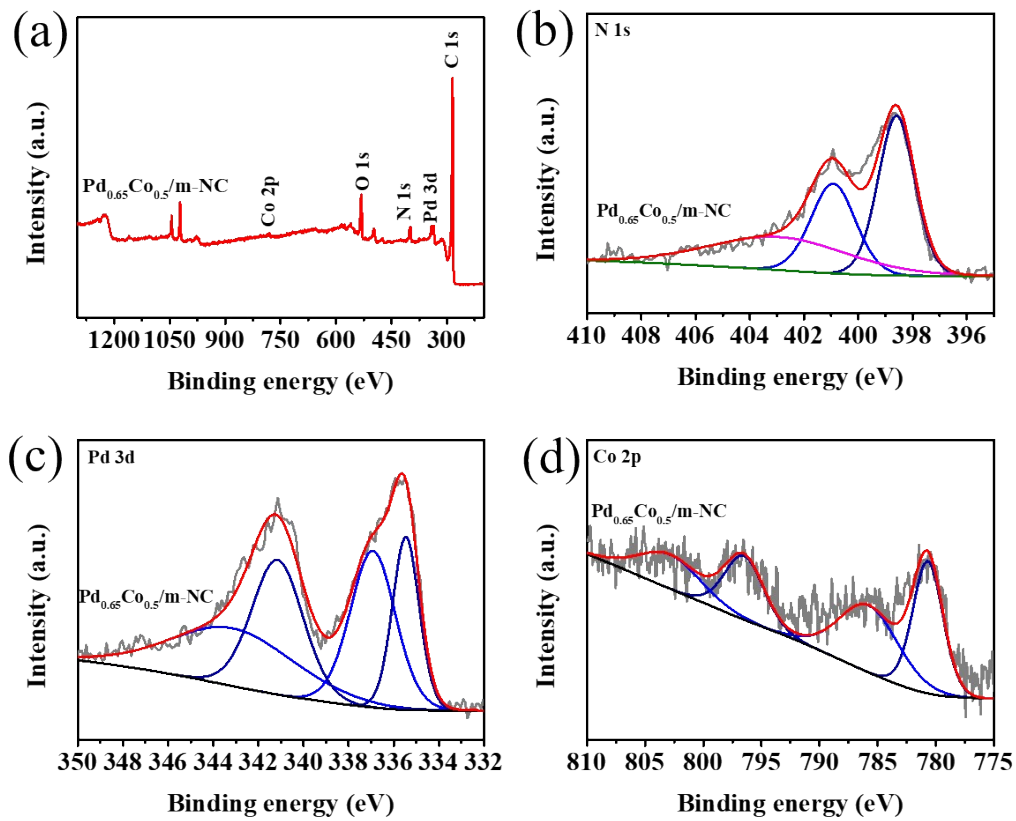

**Figure S2.** (a) The full-range XPS spectrum of  $\text{Pd}_{0.65}\text{Co}_{0.5}/\text{m-NC}$ . The XPS spectra of N 1s (b), Pd 3d (c) and Co 2p (d) of  $\text{Pd}_{0.65}\text{Co}_{0.5}/\text{m-NC}$ .

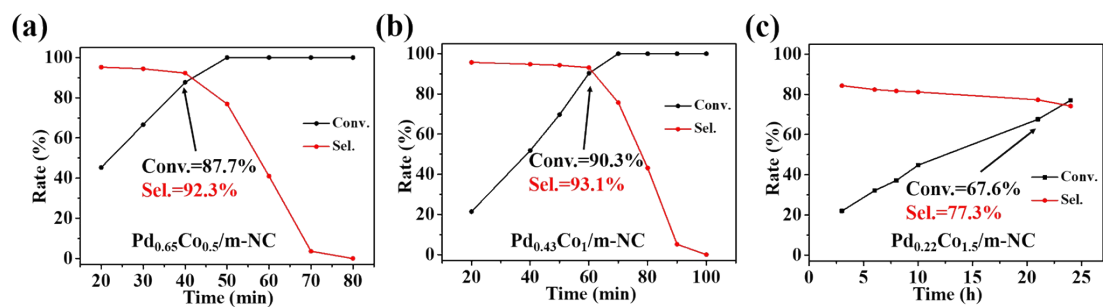

**Figure S3.** The trend of conversion and selectivity of phenylacetylene semi-hydrogenation reaction catalyzed by (a) Pd<sub>0.65</sub>Co<sub>0.5</sub>/m-NC, (b) Pd<sub>0.43</sub>Co<sub>1</sub>/m-NC and (c) Pd<sub>0.22</sub>Co<sub>1.5</sub>/m-NC under same conditions (10 mg catalyst, 1 mmol phenylacetylene, 5 mL ethanol, room temperature, 1 atm H<sub>2</sub>).

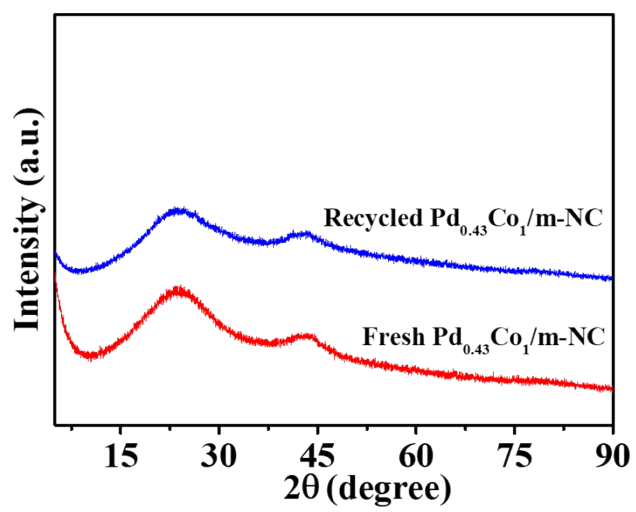

**Figure S4.** PXRD pattern of fresh Pd<sub>0.43</sub>Co<sub>1</sub>/m-NC and recycled Pd<sub>0.43</sub>Co<sub>1</sub>/m-NC.

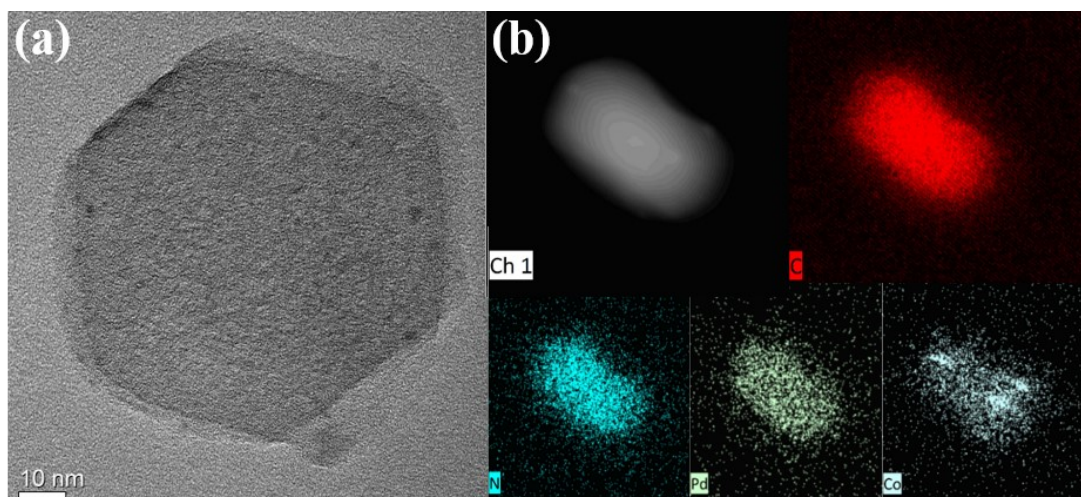

**Figure S5.** (a) TEM images of the recycled Pd<sub>0.43</sub>Co<sub>1</sub>/m-NC and histogram of the distribution of PdCo NCs. (b) EDX mapping of composition element C, N, Pd and Co in recycled Pd<sub>0.43</sub>Co<sub>1</sub>/m-NC.

**Table S1.** BET surface area and pore structure characterization parameters of materials.

| Samples                                  | BET surface area (m <sup>2</sup> ·g <sup>-1</sup> ) | t-Plot micropore area (m <sup>2</sup> ·g <sup>-1</sup> ) | Pore volume (cm <sup>3</sup> ·g <sup>-1</sup> ) | t-Plot micropore volume (cm <sup>3</sup> ·g <sup>-1</sup> ) | Average pore size (nm) |
|------------------------------------------|-----------------------------------------------------|----------------------------------------------------------|-------------------------------------------------|-------------------------------------------------------------|------------------------|
| m-NC                                     | 1008.93                                             | 637.7                                                    | 0.39                                            | 0.32                                                        | 2.51                   |
| Pd <sub>0.43</sub> Co <sub>1</sub> /m-NC | 1132.41                                             | 727.5                                                    | 0.49                                            | 0.36                                                        | 2.65                   |

**Table S2.** Fitting data for H<sub>2</sub>-TPD spectra of different materials.

| Samples                                  | Peak type | Center Grvty | Area Intg | FWHM  |
|------------------------------------------|-----------|--------------|-----------|-------|
| Co <sub>1</sub> /m-NC                    | Gaussian  | 432.2        | 2.6       | 126.7 |
|                                          | Gaussian  | 681.9        | 1.4       | 55.8  |
| Pd <sub>0.43</sub> /m-NC                 | Gaussian  | 484.1        | 11.2      | 177.5 |
| Pd <sub>0.43</sub> Co <sub>1</sub> /m-NC | Gaussian  | 492.7        | 19.1      | 196.4 |

**Table S3.** Comparison the catalytic performance for semi-hydrogenation of alkynes presented in literatures and this work.

| Entry | Catalyst                              | Substrate             | T (°C) | P (MPa) | Conv. (%) | Alkene Sel. (%) | Ref. |
|-------|---------------------------------------|-----------------------|--------|---------|-----------|-----------------|------|
| 1     | Pd/C                                  | 2-Butyne-1,4-diol     | 65     | 0.3     | 65        | 73              | [1]  |
| 2     | PdCu/ZnO                              | Dehydroisophytol      | 80     | 0.4     | 99        | 95-97           | [2]  |
| 3     | PdAg/ZnO                              | Dehydroisophytol      | 80     | 0.4     | 99        | 97-98           |      |
| 4     | UiO-67@Pd@UiO-67 (50 nm)              | phenylacetylene       | 10     | 0.5     | >99       | 93.1            | [3]  |
| 5     | Pd/Al <sub>2</sub> O <sub>3</sub>     | acetylene             | 200    | -       | 43        | 17              | [4]  |
| 6     | PdGa                                  | acetylene             | 200    | -       | 86        | 75              |      |
| 7     | PdZn/CN@ZnO                           | Dehydroisophytol      | 50     | 1.0     | 96        | >99             | [5]  |
| 8     | PdZn/Al <sub>2</sub> O <sub>3</sub>   | 2-Methyl-3-butyn-2-ol | 100    | 0.1     | 25        | 90              | [6]  |
| 9     | Pd-Ru@ZIF-8                           | phenylacetylene       | 100    | 0.1     | 98        | 96              | [7]  |
| 10    | PdIn/MgAl <sub>2</sub> O <sub>4</sub> | phenylacetylene       | 25     | 0.1     | 92        | 97              | [8]  |
| 11    | This work                             | phenylacetylene       | R.T.   | 0.1     | >99       | 93.6            | -    |

## Reference

- [1] I.T. Duncanson, I.W. Sutherland, B. Cullen, S.D. Jackson, D. Lennon, The hydrogenation of 2-butyne-1,4-diol over a carbon-supported palladium catalyst, *Catal. Lett.*, 103 (2005) 195-199.
- [2] A. Yarulin, I. Yuranov, F. Cardenas-Lizana, D.T.L. Alexander, L. Kiwi-Minsker, How to increase the selectivity of Pd-based catalyst in alkynol hydrogenation: Effect of second metal, *Appl. Catal. A-Gen.*, 478 (2014) 186-193.
- [3] K. Choe, F.B. Zheng, H. Wang, Y. Yuan, W.S. Zhao, G.X. Xue, X.Y. Qiu, M. Ri, X.H. Shi, Y.L. Wang, G.D. Li, Z.Y. Tang, Fast and Selective Semihydrogenation of Alkynes by Palladium Nanoparticles Sandwiched in Metal-Organic Frameworks, *Angew. Chem. Int. Edit.*, 59 (2020) 3650-3657.
- [4] M. Armbruster, K. Kovnir, M. Behrens, D. Teschner, Y. Grin, R. Schlogl, Pd-Ga Intermetallic Compounds as Highly Selective Semihydrogenation Catalysts, *J. Am. Chem. Soc.*, 132 (2010) 14745-14747.
- [5] L.F. Shen, S.J. Mao, J.Q. Li, M.M. Li, P. Chen, H.R. Li, Z.R. Chen, Y. Wang, PdZn intermetallic on a CN@ZnO hybrid as an efficient catalyst for the semihydrogenation of alkynols, *J. Catal.*, 350 (2017) 13-20.
- [6] A. Gonzalez-Fernandez, A. Berenguer-Murcia, D. Cazorla-Amoros, F. Cardenas-Lizana, Zn-Promoted Selective Gas-Phase Hydrogenation of Tertiary and Secondary C4 Alkynols over Supported Pd, *ACS Appl. Mater. Interfaces*, 12 (2020) 28158-28168.
- [7] Z. Li, M. Hu, J. Liu, W. Wang, Y. Li, W. Fan, Y. Gong, J. Yao, P. Wang, M. He, Y. Li, Mesoporous silica stabilized MOF nanoreactor for highly selective semi-hydrogenation of phenylacetylene via synergistic effect of Pd and Ru single site, *Nano Research*, 15 (2022) 1983-1992.
- [8] Q.C. Feng, S. Zhao, Y. Wang, J.C. Dong, W.X. Chen, D.S. He, D.S. Wang, J. Yang, Y.M. Zhu, H.L. Zhu, L. Gu, Z. Li, Y.X. Liu, R. Yu, J. Li, Y.D. Li, Isolated Single-Atom Pd Sites in Intermetallic Nanostructures: High Catalytic Selectivity for Semihydrogenation of Alkynes, *J. Am. Chem. Soc.*, 139 (2017) 7294-7301.
